# Supplementary material
Source: Elsevier journal article supplement (https://www.sciencedirect.com/science/article/pii/S0001731013000379)
Supplement: mmc1 [file S0001731013000379:mmc1.docx]

**Anexo 1. Incidente crítico**

**Nombre del alumno SAP**

**Incidente crítico núm.** Fecha: / /

Descripción del incidente:

| **Cuestiones clave** |
| --- |
| **¿Que conozco sobre el tema? (competencias consolidadas)** |
| **¿Que me falta por aprender? (objetivos de aprendizaje)**  Obj 1.  Obj 2.  Obj 3.  Obj 4.  Obj 5. |
| **¿Cómo lo puedo aprender? (métodos para alcanzar los objetivos)**  Obj 1.  Obj 2.  Obj 3.  Obj 4.  Obj 5.  (puede haber 1 o más métodos por objetivo) |

#### Métodos para alcanzar los objetivos

1. Consulta de libros

2. Búsqueda bibliográfica

3. Preparación de una sesión clínica o bibliográfica

4. Cursos/seminarios/talleres

5. Ayuda del tutor

6. Consulta a otros especialistas

7. Investigación propia sobre el tema

**Respuesta a los objetivos planteados**

1. Obj. 1

2. Obj. 2.

3. Obj. 3.

4. Obj. 4.

5. Obj. 5.

**Anexo 2**

**Hoja de aprendizaje “Prácticas asistenciales IV”**

**Rotación por el servicio de: Dermatología**

**Nombre del estudiante Nombre del tutor**

| **A. Competencias** | si/no |
| --- | --- |
| 1.Manejar (diagnosticar, diferenciar y derivar o tratar) las dermatosis comunes |  |
| 2. Manejar (diagnosticar, diferenciar y derivar o tratar) los tumores cutáneos comunes |  |
| 3. Reconocer en el paciente los signos de gravedad o alarma de una dermatosis |  |
| 4. Reconocer en el paciente los signos de gravedad o alarma de un tumor cutáneo (en especial los pigmentados) |  |

| B. Objetivos de aprendizaje |  |
| --- | --- |
| **a. Conocimientos** | si/no |
| 1. Infecciones cutáneas  a. Piodermitis: impétigo, foliculitis y forunculosis  b. Micosis: dermatofitosis, candidiasis y pitiriasis versicolor  c. Virasis: virus herpes (herpes simple, herpes zoster, varicela), papilomavirus (verruga vulgar y plantar, verrugas genitales), *molluscumcontagiosum*  d. Infecciones de transmisión sexual: uretritis, condilomas acuminados, herpes genital y sífilis |  |
| 2. Dermatosis anexiales (acné y rosácea) |  |
| 3. Dermatitis atópica y otros eczemas (dermatitis seborreica, dishidrosis, dermatitis de contacto y neurodermitis) |  |
| 4. Psoriasis y pitiriasis rosada |  |
| 5. Dermatosis reactivas (urticaria, vasculitis leucocitoclástica y liquen plano) |  |
| 6. Vitíligo |  |
| 7. Alopecias comunes (alopecia *areata* y alopecia androgénica) |  |
| 8. Tumores cutáneos comunes  a. Benignos: queratosis seborreicas, acrocordones, quistes epidérmicos, dermatofibromas y angiomas  b. Precáncer (queratosis actínicas) y cáncer cutáneo (carcinoma basocelular y espinocelular)  c. Nevusmelanocíticos y melanoma |  |
| 9. Prurito sin dermatosis evidente |  |
| 10. Manifestaciones cutáneas de enfermedades internas  a. Colagenosis: Lupus eritematoso, dermatomiositis y esclerodermia  b. Paniculitis: eritema nodoso y eritema indurado de Bazin  c. Linfomas cutáneos (*micosis fungoide* y síndrome de Sézary) |  |
| **b. Habilidades** | **si/no** |
| **b1. De comunicación oral**  11. Realizar correctamente una entrevista clínica. Comentar de forma comprensible con el paciente la necesidad o no de tratamiento  12. Comunicar en el equipo |  |
| **b2. De comunicación escrita**  13. Redactar correctamente una historia clínica dermatológica sobre una erupción y un tumor cutáneo  a) Describir con precisión las características de la erupción o el tumor  b) Establecer el diagnóstico y el diagnóstico diferencial básico  c) Razonar y anotar las pruebas complementarias a solicitar  d) Proponer un plan terapéutico |  |
| **b3. Habilidades prácticas** (aprendizaje tutorizado)  14. Hacer correctamente una crioterapia y un curetaje con electrocoagulación  15. Hacer correctamente una cuña cutánea (opcional) |  |
| **c. Actitudes** | si/no |
| 16. Puntualidad y asistencia (90%) |  |
| 17. Consideración y respeto con los pacientes y los compañeros |  |
| 18. Expresar puntos de vista y desarrollar una actitud inquisitiva |  |
| 19. Demostrar interés por la mejora continua |  |

| C. Actividades y tareas a realizar | si/no |
| --- | --- |
| 1. Desarrollar un incidente crítico al día (introducirlos en el portafolio) |  |
| 2. Hacer 5 historias clínicas (introducirlas en el portafolio) |  |
| 3) Hacer 5 crioterapias, 2 curetajes, 2 electrocoagulaciones (aprendizaje tutorizado) y una cuña cutánea (opcional) |  |
| 4. Actividades científicas  a. Asistir a las sesiones del servicio (introducir un resumen de las sesiones en el portafolio)  b. Presentar una sesión (clínica/bibliográfica/de revisión) en el servicio, bajo tutorización (introducir las diapositivas de la sesión -6 por página-, en el portafolio) |  |

| D. EVALUACIÓN Es imprescindible una asistencia del 90% |  |
| --- | --- |
| 1. Informe del tutor (50%) | **50 puntos** |
| **Conocimientos** | **10 puntos** |
| -Análisis de 5 incidentes críticos (reflexión adecuada, búsqueda correcta y basada en la evidencia, soluciones de los objetivos bien planteadas) |  |
| **Habilidades de comunicación** | **10puntos** |
| -Oral: Comunicación con el paciente (ECOE/*WPBA*)  -Escrita: *audit*de 5 historias clínicas |  |
| **Habilidades prácticas** | **10 puntos** |
| Realización de crioterapias, curetajes, electrocoagulaciones y cuñas cutáneas (*OSATS/WPBA*) |  |
| **Actividades científicas** | **10 puntos** |
| Asistencia a las sesiones del servicio y presentación de una sesión (*WPBA*) |  |
| **Actitud del estudiante** | **10 puntos** |
| Asistencia y puntualidad  Consideración y respeto por el paciente y los compañeros  Interés por aprender, expresar puntos de vista, ser críticos |  |
| **ECOE** | **50 puntos** |

| **TOTAL** | **Puntos** |
| --- | --- |
| **CALIFICACIÓN DE LA ROTACIÓN** | **Ins/Suf/Not/Exc** |

Fecha y firma del tutor Firma del estudiante

##### Informe del tutor

**Nombre del tutor:**

**Servicio de:**

**Nombre delestudiante:**

(puntuar de 0 a 5)

**a. Conocimientos (2 puntos)**

| Ha desarrollado correctamente 3/5 incidentes críticos (rotación corta/larga) | 0 1 2 3 4 5 |
| --- | --- |
| Ha resuelto correctamente el diagnóstico, ha planteado el diagnóstico diferencial y ha propuesto con juicio clínico el tratamiento de 3 pacientes reales | 0 1 2 3 4 5 |

#### Total /2

#### b. Comunicación (2 puntos)

| Comunicacióncon el paciente (empatía, comunicación del diagnóstico, de las pruebas a realizar y del tratamiento) | 0 1 2 3 4 5 |
| --- | --- |
| Comunicación científica (presentación de una sesión en el servicio) (solo rotaciones de 1 mes) | 0 1 2 3 4 5 |
| Comunicación escrita (historias clínicas, notas de ingresoe informes clínicos) | 0 1 2 3 4 5 |

**Total /3**

**c. Habilidades prácticas (4 puntos)**

| 1. Realización de 2 crioterapias | 0 1 2 3 4 5 |
| --- | --- |
| 2. Realización de un curetaje | 0 1 2 3 4 5 |
| 3. Realización de una electrocoagulación | 0 1 2 3 4 5 |
| 4. Realización de una biopsia cutánea con punch | 0 1 2 3 4 5 |
| 5. Realización de una cuña cutánea | 0 1 2 3 4 5 |
| 6. Realización de la toma de escamas de la piel y observación de un KOH | 0 1 2 3 4 5 |
| 7. | 0 1 2 3 4 5 |

**Total /**

**2. Actitudes (2 puntos)**

| Ha tenido una actitud de colaboracióny respetocon los profesionales del servicio | 0 1 2 3 4 5 |
| --- | --- |
| Ha tenido una actitud considerada y empática con los pacientes y los familiares | 0 1 2 3 4 5 |
| Muestra interés por aprender, pregunta y participa en las actividades del servicioy expresa opiniones criticas | 0 1 2 3 4 5 |
| Puntualidad i asistencia (> 80%) | 0 1 2 3 4 5 |

**Total /4**

**3. Incidencias durante la rotación**

1.

2.

3.

4.

**4. Aspectos a mejorar**

1.

2.

3.

4.

Firma del tutor Firma del estudiante

Fecha .....

**Relación de documentos (a rellenar por el propio estudiante)**

**1.Historias clínicas**

| **Num SAP** | **Diagnóstico** | **Diagnóstico diferencial** |
| --- | --- | --- |
| 1. |  |  |
| 2. |  |  |
| 3. |  |  |
| 4. |  |  |
| 5. |  |  |

**2. Incidentes críticos**

| **Num SAP** | **Descripción delincidente** |
| --- | --- |
|  |  |
|  |  |
|  |  |
|  |  |
|  |  |

**3. Actividades prácticas**

| Fecha | Actividad | Firma del tutor |
| --- | --- | --- |
| 1. |  |  |
| 2. |  |  |
| 3. |  |  |
| 4. |  |  |
| 5. |  |  |
| 6. |  |  |
| 7. |  |  |
| 8. |  |  |
| 9. |  |  |
| 10. |  |  |

**4. Sesiones**

**4a. Sesiones que ha asistido**

| Tipo | Resumen |
| --- | --- |
|  |  |
|  |  |
|  |  |
|  |  |

**4b. Sesiones que ha presentado**

| Tipo | Resumen |
| --- | --- |
|  |  |
|  |  |
|  |  |
|  |  |

**Anexo 3**

**Proforma de historia clínica dermatológica sobre una erupción**

**Datos generales**

**Filiación del paciente**

Num. de historia clínica

Apellidos y nombre Edad

**Antecedentes**

Antecedentes patológicos personales y familiares

Fármacos que toma

Reacciones alérgicas a fármacos

**Enfermedad actual**

Tiempo de evolución de la erupción

Lugar de inicio

Relaciones con el trabajo, el sol, el tratamiento hecho (anotar los tratamientos hechos hasta ahora)

**Exploración cutánea**

a) Lesión elemental

-tipo (primaria: mácula, pápula -habón, púrpura, placa- vesícula, pústula, ampolla; secundarias: escama, liquenificación, erosión-excoriación, úlcera-, costra, etc…

-forma, color, características de la superficie

b) Agrupación y distribución de la erupción

-localización y distribución regional

-agrupación (herpetiforme, irregular y en pequeños grupos, lineal -*koebner*-)

-simetría/asimetría

-patrones básicos (dermatología regional)

**Anexo 4. Proforma de historia clínica de un tumor cutáneo**

**Nombre del estudiante SAP del paciente**

Fecha

**Motivo de consulta**

Tiempo de evolución del tumor y progresión posterior (crecimiento, ulceración, sangrado)

Fototipo (I-VI)

Historia de exposición solar y quemaduras solares

Exposición a lámparas de UV

Antecedentes familiares y personales de melanoma o nevus atípicos

Detección de alguna lesión cambiante, prurito, dolor o sangrado

**Exploración cutánea**

a) Características del tumor

-Color: de la piel, hiperpigmentado, hipopigmentado, eritematoso, de aspecto vascular

-Número: único, pocas lesiones, múltiples lesiones

-Tiempo de evolución (semanas, meses, años)

-Características de la superficie: lisa, queratósica, ulcerada, papilomatosa, con tapones córneos, fisurada

-Tamaño del tumor

-Localización del tumor: zonas fotoexpuestas–cabeza y cuello (frente, mejillas, orejas, lados del cuello), dorso de las manos, parte superior de la espalda-; tronco, piernas, brazos

-Consistencia: dura, blanda, elástica, quística, pétrea

-En lesiones pigmentadas

Análisis de todas las lesiones

Detección de alguna lesión diferente (“patito feo”)

Registro de número de lesiones

Detalle de lesiones “atípicas”: tamaño, borde, color, simetría, ulceración

**Exploración general**

(en caso de tumores con capacidad metastásica)

Adenomegalias

Visceromeglias
